# Supplementary material for: Can TEMPO-Oxidized Cellulose Nanofibers Be Used as Additives in Bio-Based Building Materials? A Preliminary Study on Earth Plasters
Source: MDPI journal article supplement (doi:10.3390/ma16010074), 2022-12-21
Supplement: s1 [file s1]

Supporting Information for

**Can TEMPO-oxidized cellulose nanofibers be used as  
additives in bio-based building materials?  
A preliminary study on earth-plasters**

Paola Gallo Stampino<sup>1,\*</sup>, Laura Riva<sup>1,\*</sup>, Marco Caruso<sup>1</sup>, Imran Abdul Rahman<sup>1</sup>,  
Graziano Elegir<sup>2</sup>, Daniele Bussini<sup>2</sup>, Javier Marti Rujas<sup>1</sup>, Giovanni Dotelli<sup>1</sup> and Carlo Punta<sup>1,3</sup>

<sup>1</sup> Politecnico di Milano, Department of Chemistry, Materials and Chemical Engineering “G.Natta”,  
p.zza L. da Vinci 32, 20133 Milano, Italy;

<sup>2</sup> Innovhub Stazioni Sperimentali per l’Industria S.r.l., Via Giuseppe Colombo 83, 20133 Milano,  
Italy;

<sup>3</sup> Milano Politecnico Research Unit, National Interuniversity Consortium of Materials Science and  
Technology – INSTM, Via Mancinelli 7, 20131 Milan, Italy.

**Table of Contents**

1. Earths XRD.....S2

2. TG analyses.....S3

3. Schopper-Riegler of cellulose sources.....S5

4. FT-IR Spectra.....S5

5. XRD Diffractograms and Crystallinity Index.....S7

# 1. Earths XRD

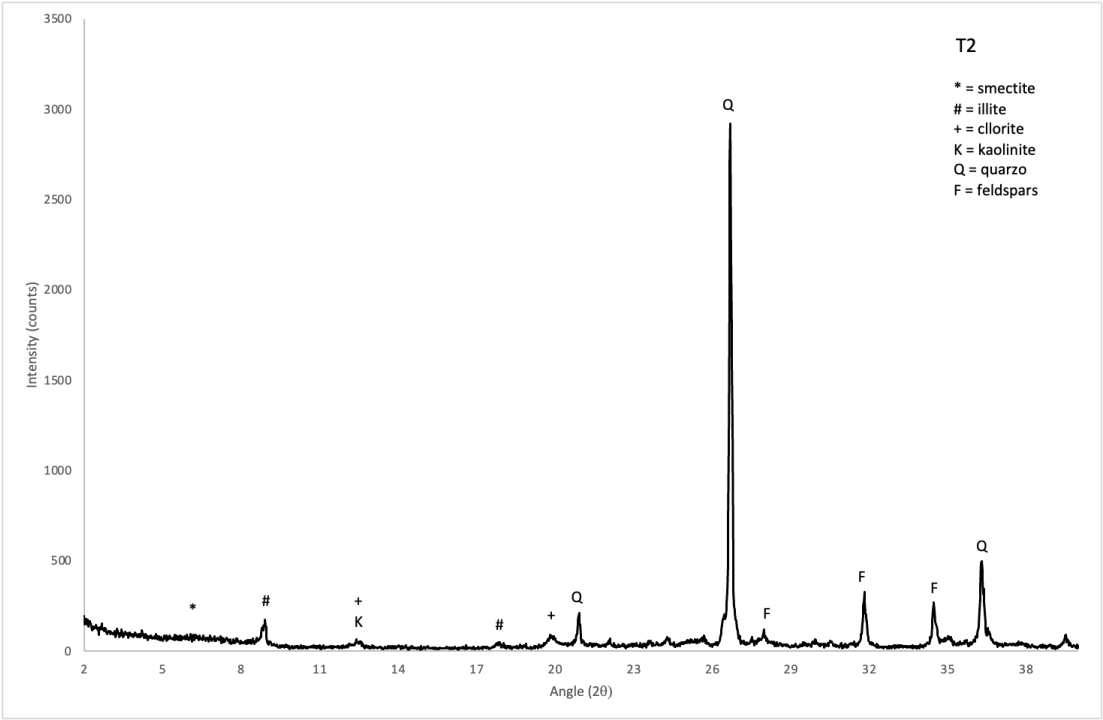

Figure S1: XRD pattern of T2 earth.

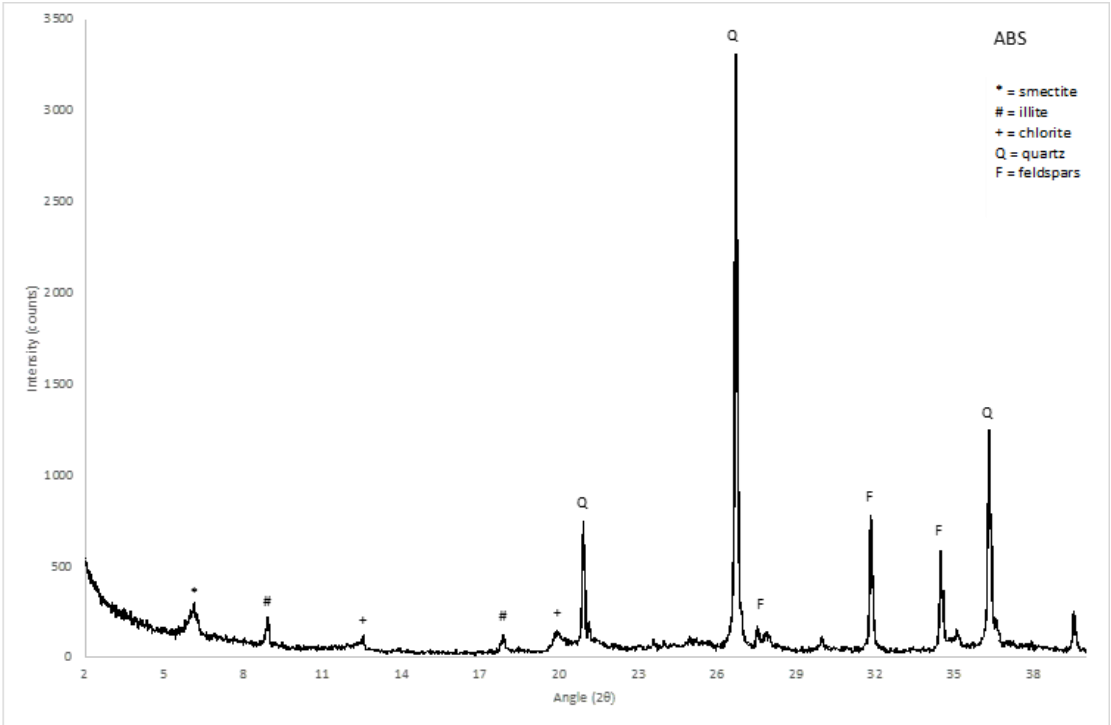

Figure S2: XRD pattern of ABS earth.

## 2. TG analyses

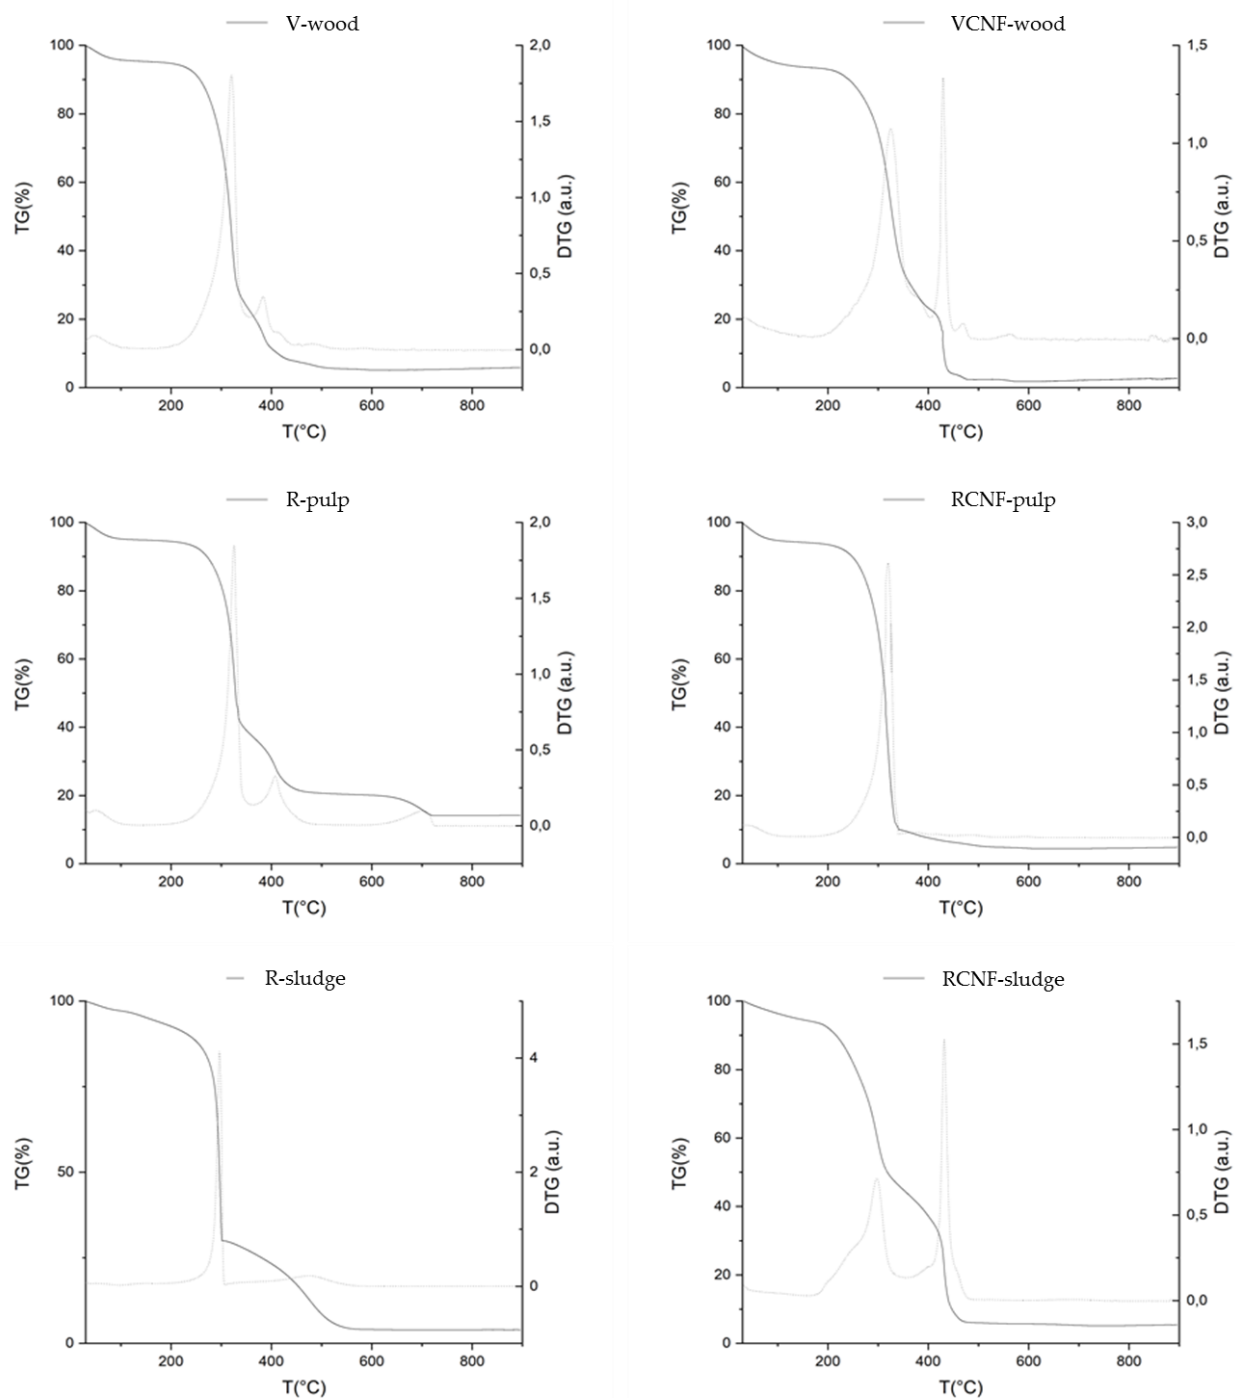

**Figure S3.** Thermogravimetric analysis of cellulose sources and additives obtained by TOHO process; analyses performed in air.

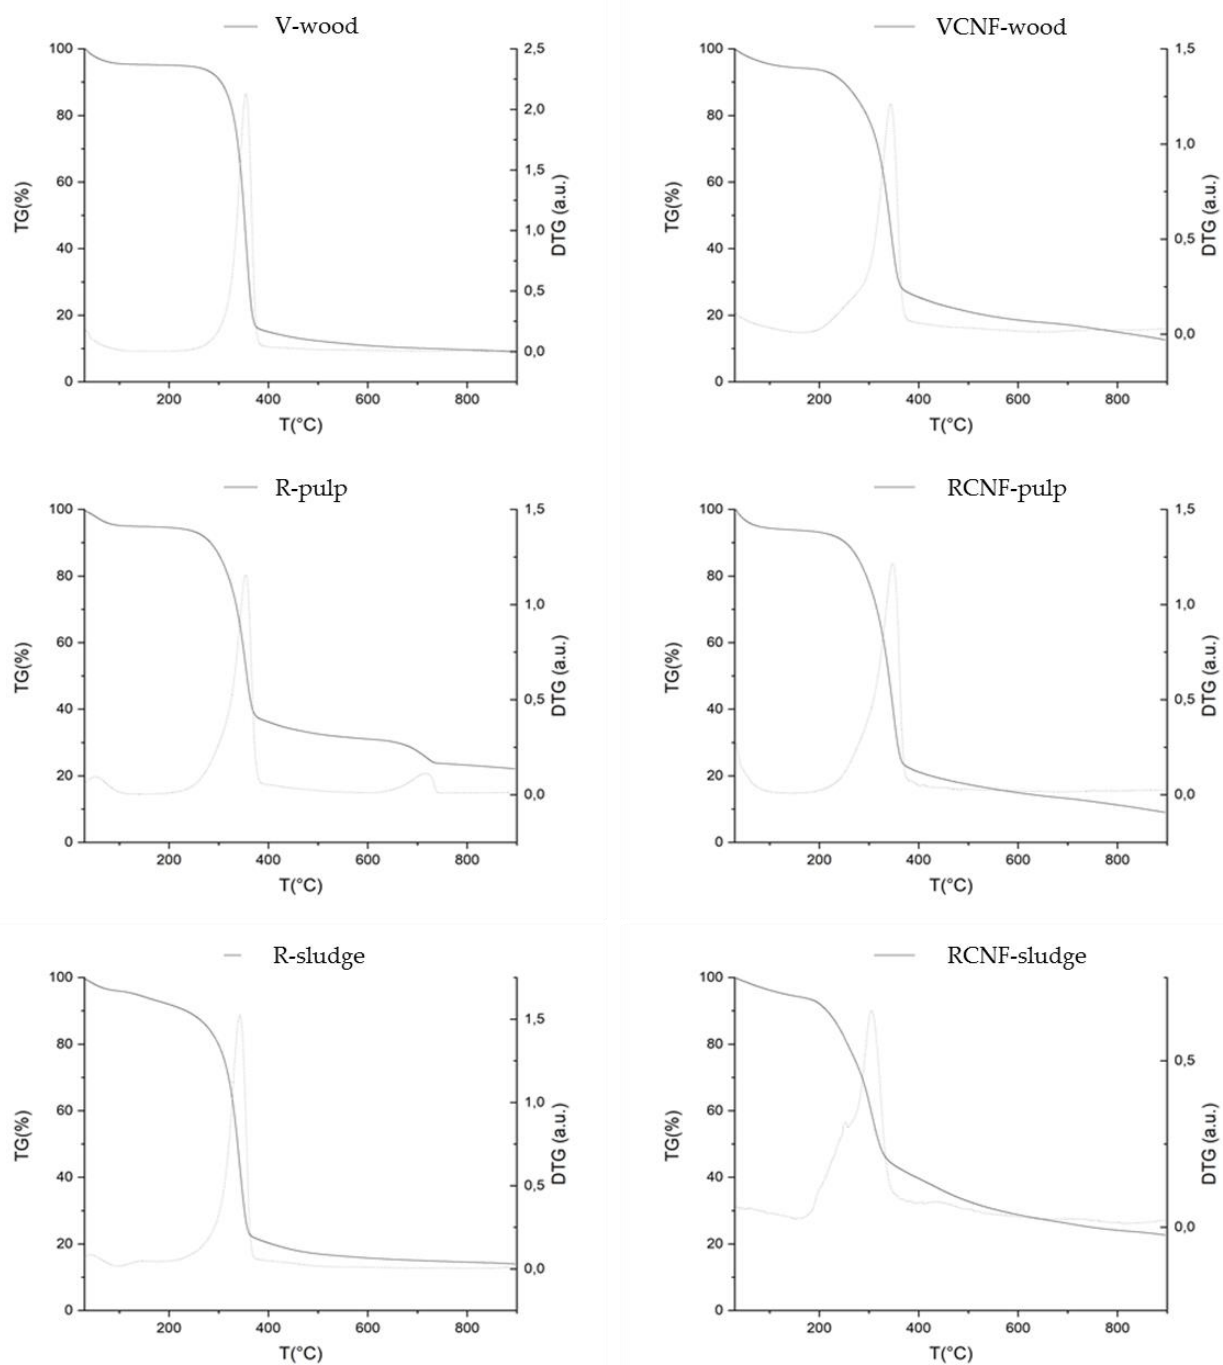

**Figure S4.** Thermogravimetric analysis of cellulose sources and additives obtained by TOHO process; analyses performed in  $\text{N}_2$ .

### 3. Schopper-Riegler of cellulose sources

**Table S1.** Drainage (°SR) of cellulose pulp calculated for each source selected for the production of cellulose nanofibers.

| Source   | °SR |
|----------|-----|
| V-wood   | 14  |
| R-pulp   | 17  |
| R-sludge | 26  |

### 4. FT-IR Spectra

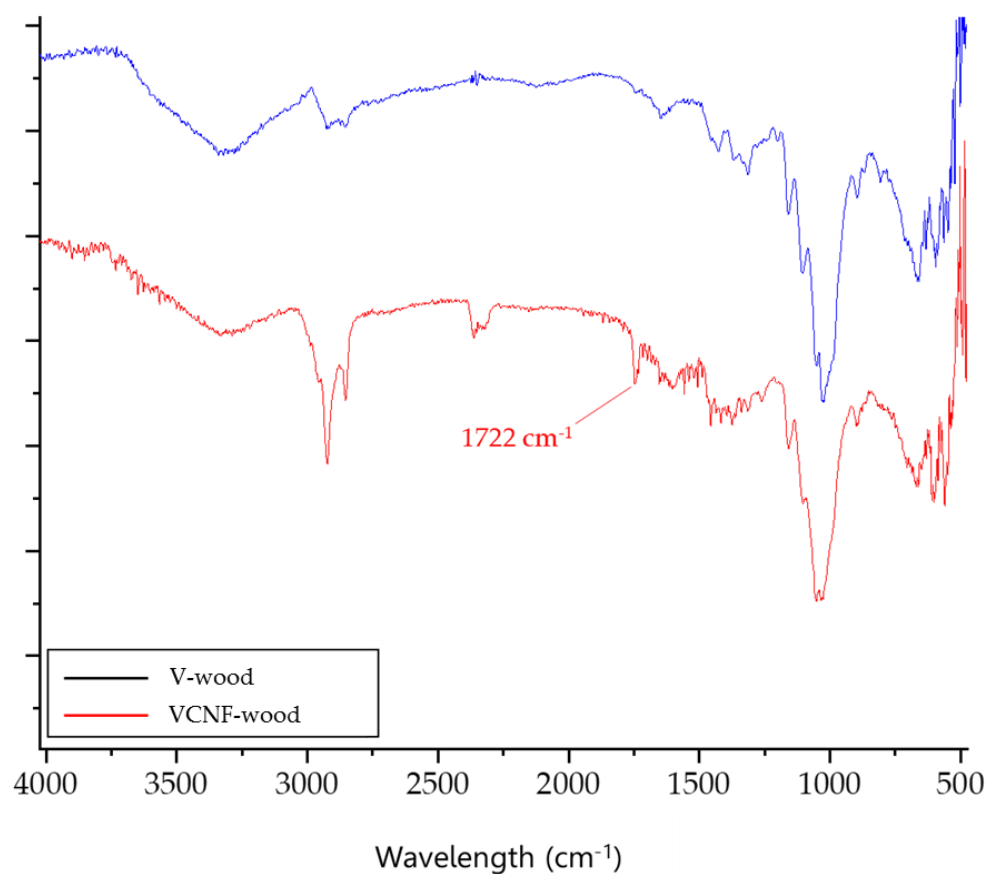

**Figure S5.** FT-IR spectrum of V-wood and VCNF-wood.

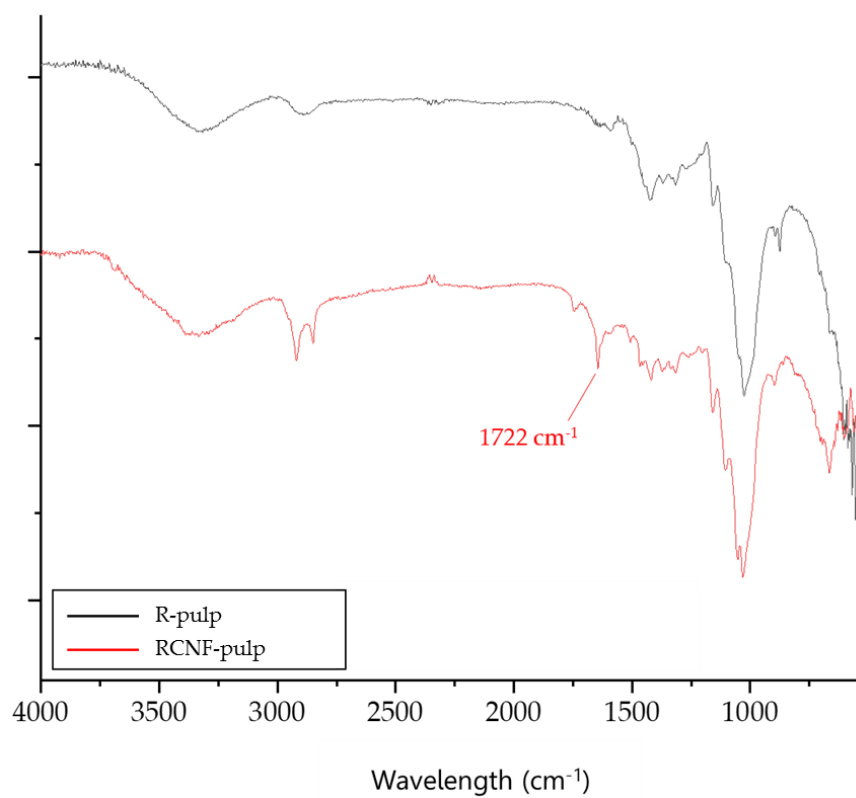

**Figure S6.** FT-IR spectrum of R-pulp and RCNF-pulp.

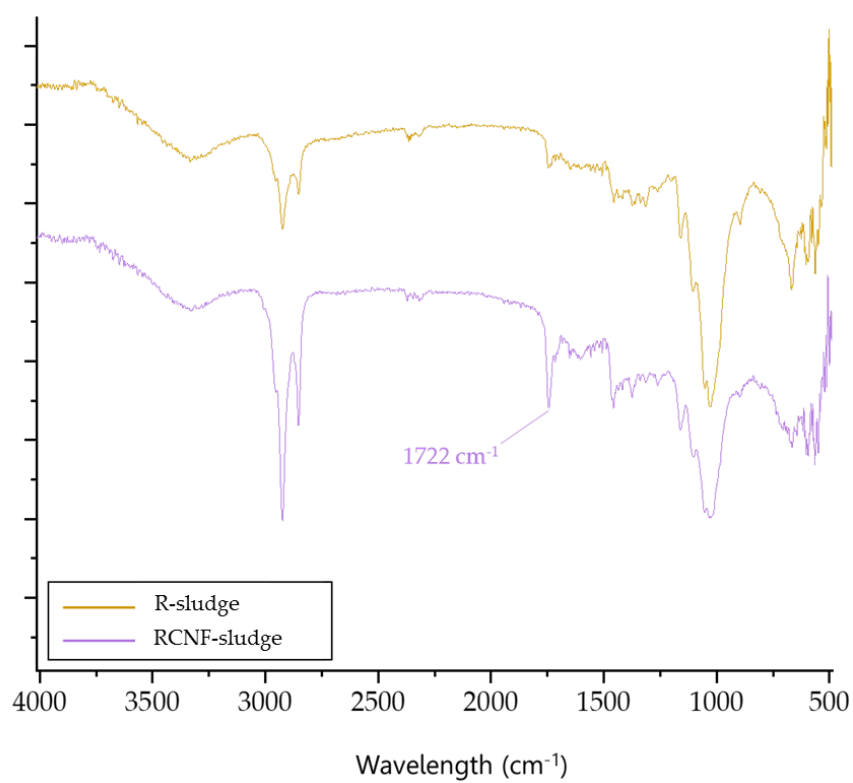

**Figure S7.** FT-IR spectrum of R-sludge and RCNF-sludge.

## 5. XRD Diffractograms and Crystallinity Index

**Table S2.** Crystallinity index of sources and cellulose-based nanodimensioned additives.

| Cellulose-based additive | Crystallinity index [%] |
|--------------------------|-------------------------|
| V-wood                   | 68.5                    |
| R-pulp                   | 70.4                    |
| R-sludge                 | 67.5                    |
| VCNF-wood                | 65.3                    |
| RCNF-pulp                | 62.2                    |
| RCNF-sludge              | 67.0                    |

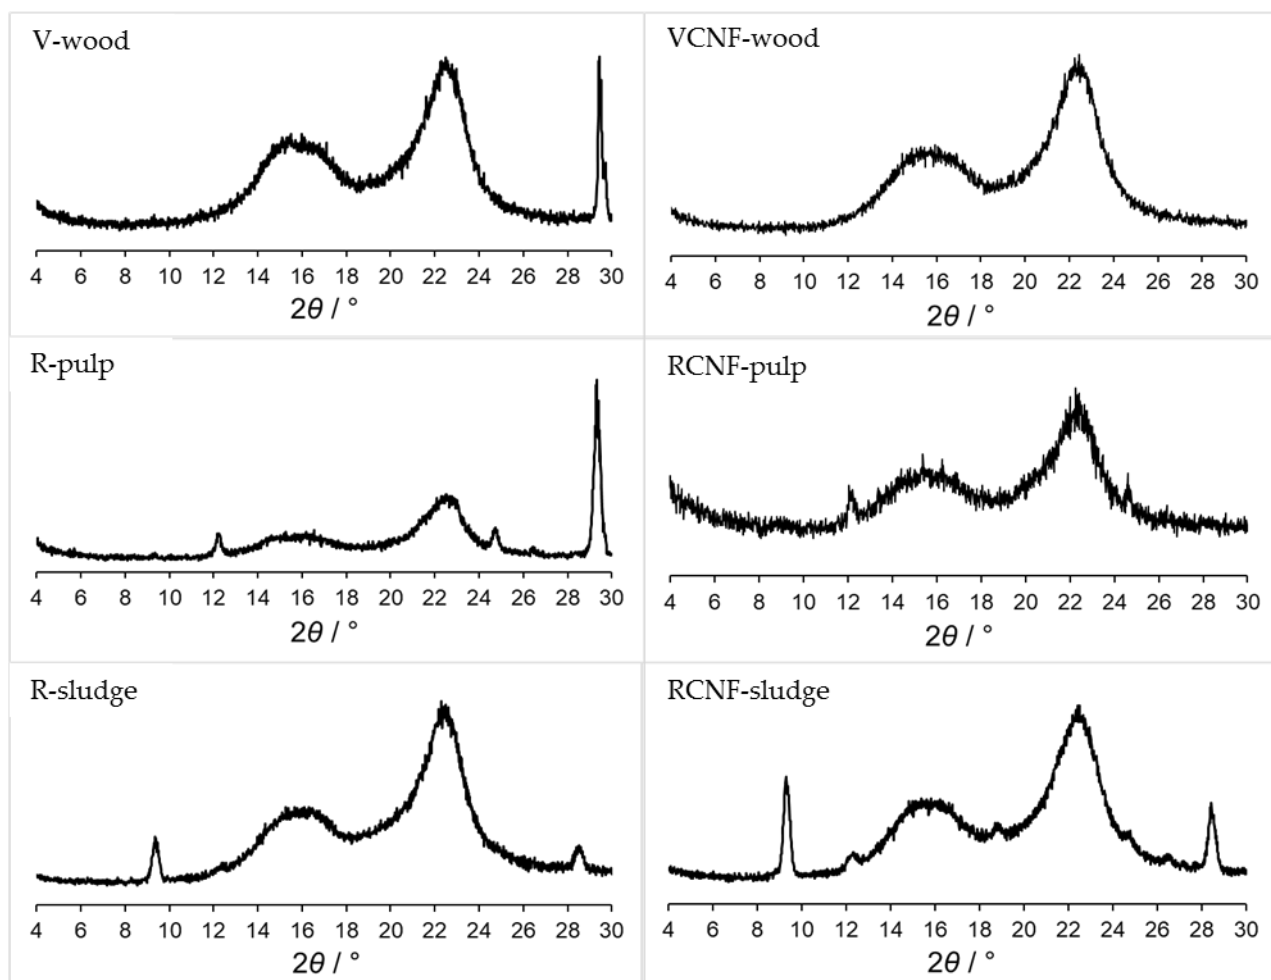

**Figure S8.** X-Ray diffractograms of cellulose sources and additives obtained by TOHO process.
